# Supplementary material for: Bottlenecks in erucic acid accumulation in genetically engineered ultrahigh erucic acid Crambe abyssinica
Source: PubMed Central journal article supplement — Plant Biotechnol J. 2013 Oct 14;12(2):193–203. doi: 10.1111/pbi.12128 (PMC4286110; doi:10.1111/pbi.12128), 2013-10-14
Supplement: pbi0012-0193-SD1.pdf [file pbi0012-0193-SD1.pdf]

**Table S1** Total fatty acid (FA) composition and content in wild type (Wt) and genetic modified (GM) Crambe seeds at different days after flowering (DAF). The results are from duplicate analyses  $\pm$  SD.

| Seeds |        | Total FA composition (Mol%) |               |                |                |                |               |               |               |                |               |               |
|-------|--------|-----------------------------|---------------|----------------|----------------|----------------|---------------|---------------|---------------|----------------|---------------|---------------|
|       |        | 16:0                        | 18:0          | 18:1           | 18:2           | 18:3           | 20:0          | 20:1          | 22:0          | 22:1           | 24:0          | 24:1          |
| Wt    | 20 DAF | 4.2 $\pm$ 0.0               | 1.0 $\pm$ 0.2 | 18.1 $\pm$ 0.3 | 13.7 $\pm$ 0.1 | 9.4 $\pm$ 0.0  | 0.9 $\pm$ 0.0 | 4.4 $\pm$ 0.2 | 1.7 $\pm$ 0.2 | 40.9 $\pm$ 0.1 | 0.5 $\pm$ 0.0 | 0.9 $\pm$ 0.0 |
|       | 27 DAF | 2.5 $\pm$ 0.0               | 0.7 $\pm$ 0.1 | 17.4 $\pm$ 0.2 | 11.0 $\pm$ 0.0 | 6.8 $\pm$ 0.0  | 0.7 $\pm$ 0.0 | 2.2 $\pm$ 0.0 | 2.0 $\pm$ 0.2 | 51.1 $\pm$ 0.2 | 0.6 $\pm$ 0.0 | 1.2 $\pm$ 0.0 |
|       | 34 DAF | 2.3 $\pm$ 0.0               | 0.6 $\pm$ 0.0 | 16.9 $\pm$ 0.0 | 11.5 $\pm$ 0.0 | 5.7 $\pm$ 0.0  | 0.7 $\pm$ 0.0 | 1.5 $\pm$ 0.0 | 1.6 $\pm$ 0.3 | 53.4 $\pm$ 0.6 | 0.7 $\pm$ 0.0 | 1.3 $\pm$ 0.0 |
|       | 41 DAF | 2.2 $\pm$ 0.0               | 0.6 $\pm$ 0.1 | 16.8 $\pm$ 0.1 | 11.0 $\pm$ 0.0 | 6.1 $\pm$ 0.0  | 0.7 $\pm$ 0.0 | 1.2 $\pm$ 0.0 | 1.4 $\pm$ 0.3 | 54.3 $\pm$ 0.3 | 0.7 $\pm$ 0.0 | 1.3 $\pm$ 0.0 |
|       | 50 DAF | 2.2 $\pm$ 0.0               | 0.6 $\pm$ 0.0 | 17.1 $\pm$ 0.0 | 10.9 $\pm$ 0.0 | 5.9 $\pm$ 0.0  | 0.7 $\pm$ 0.0 | 1.2 $\pm$ 0.0 | 2.1 $\pm$ 0.0 | 54.0 $\pm$ 0.0 | 0.7 $\pm$ 0.0 | 1.3 $\pm$ 0.0 |
| GM    | 20 DAF | 4.9 $\pm$ 0.0               | 1.5 $\pm$ 0.0 | 21.7 $\pm$ 0.0 | 7.2 $\pm$ 0.0  | 12.4 $\pm$ 0.0 | 0.8 $\pm$ 0.1 | 6.1 $\pm$ 0.1 | 1.4 $\pm$ 0.1 | 36.9 $\pm$ 0.1 | 0.8 $\pm$ 0.0 | 0.9 $\pm$ 0.0 |
|       | 27 DAF | 2.5 $\pm$ 0.0               | 0.7 $\pm$ 0.1 | 12.6 $\pm$ 0.1 | 4.1 $\pm$ 0.0  | 6.9 $\pm$ 0.0  | 0.6 $\pm$ 0.0 | 4.7 $\pm$ 0.0 | 2.0 $\pm$ 0.1 | 58.9 $\pm$ 0.0 | 0.7 $\pm$ 0.0 | 1.6 $\pm$ 0.0 |
|       | 34 DAF | 1.9 $\pm$ 0.0               | 0.6 $\pm$ 0.0 | 8.8 $\pm$ 0.0  | 2.7 $\pm$ 0.0  | 5.3 $\pm$ 0.0  | 0.5 $\pm$ 0.0 | 2.9 $\pm$ 0.1 | 1.4 $\pm$ 0.2 | 68.2 $\pm$ 0.2 | 0.8 $\pm$ 0.0 | 2.1 $\pm$ 0.0 |
|       | 41 DAF | 1.9 $\pm$ 0.0               | 0.5 $\pm$ 0.1 | 8.6 $\pm$ 0.1  | 2.4 $\pm$ 0.0  | 5.2 $\pm$ 0.0  | 0.5 $\pm$ 0.0 | 3.1 $\pm$ 0.0 | 1.2 $\pm$ 0.1 | 69.0 $\pm$ 0.1 | 0.8 $\pm$ 0.0 | 2.2 $\pm$ 0.1 |
|       | 50 DAF | 1.8 $\pm$ 0.0               | 0.5 $\pm$ 0.0 | 8.4 $\pm$ 0.0  | 2.2 $\pm$ 0.0  | 5.1 $\pm$ 0.0  | 0.5 $\pm$ 0.0 | 2.7 $\pm$ 0.0 | 2.1 $\pm$ 0.0 | 69.6 $\pm$ 0.0 | 0.8 $\pm$ 0.0 | 2.1 $\pm$ 0.0 |
| Seeds |        | FA content (nmol/seed)      |               |                |                |                |               |               |               |                |               |               |
|       |        | 16:0                        | 18:0          | 18:1           | 18:2           | 18:3           | 20:0          | 20:1          | 22:0          | 22:1           | 24:0          | 24:1          |
| Wt    | 20 DAF | 76 $\pm$ 0                  | 18 $\pm$ 4    | 331 $\pm$ 7    | 250 $\pm$ 2    | 172 $\pm$ 1    | 17 $\pm$ 0    | 81 $\pm$ 4    | 31 $\pm$ 0    | 746 $\pm$ 5    | 8 $\pm$ 0     | 16 $\pm$ 0    |
|       | 27 DAF | 81 $\pm$ 1                  | 24 $\pm$ 2    | 577 $\pm$ 19   | 366 $\pm$ 9    | 226 $\pm$ 5    | 24 $\pm$ 0    | 73 $\pm$ 0    | 66 $\pm$ 5    | 1696 $\pm$ 45  | 20 $\pm$ 0    | 38 $\pm$ 0    |
|       | 34 DAF | 123 $\pm$ 4                 | 35 $\pm$ 1    | 926 $\pm$ 26   | 627 $\pm$ 16   | 314 $\pm$ 7    | 38 $\pm$ 2    | 81 $\pm$ 1    | 89 $\pm$ 13   | 2925 $\pm$ 108 | 37 $\pm$ 1    | 72 $\pm$ 2    |
|       | 41 DAF | 121 $\pm$ 1                 | 30 $\pm$ 4    | 912 $\pm$ 15   | 598 $\pm$ 8    | 334 $\pm$ 5    | 38 $\pm$ 0    | 67 $\pm$ 3    | 78 $\pm$ 16   | 2953 $\pm$ 54  | 38 $\pm$ 0    | 72 $\pm$ 1    |
|       | 50 DAF | 112 $\pm$ 0                 | 32 $\pm$ 0    | 874 $\pm$ 4    | 557 $\pm$ 3    | 304 $\pm$ 3    | 36 $\pm$ 1    | 62 $\pm$ 1    | 108 $\pm$ 1   | 2768 $\pm$ 17  | 34 $\pm$ 1    | 65 $\pm$ 1    |
| GM    | 20 DAF | 35 $\pm$ 1                  | 11 $\pm$ 0    | 153 $\pm$ 2    | 51 $\pm$ 1     | 87 $\pm$ 1     | 6 $\pm$ 1     | 43 $\pm$ 1    | 10 $\pm$ 1    | 260 $\pm$ 4    | 5 $\pm$ 0     | 6 $\pm$ 1     |
|       | 27 DAF | 59 $\pm$ 1                  | 17 $\pm$ 2    | 301 $\pm$ 7    | 98 $\pm$ 1     | 164 $\pm$ 3    | 14 $\pm$ 0    | 112 $\pm$ 2   | 47 $\pm$ 2    | 1411 $\pm$ 22  | 18 $\pm$ 0    | 39 $\pm$ 1    |
|       | 34 DAF | 61 $\pm$ 5                  | 18 $\pm$ 1    | 285 $\pm$ 23   | 88 $\pm$ 7     | 173 $\pm$ 14   | 18 $\pm$ 1    | 93 $\pm$ 5    | 46 $\pm$ 1    | 2202 $\pm$ 195 | 25 $\pm$ 2    | 69 $\pm$ 6    |
|       | 41 DAF | 71 $\pm$ 2                  | 19 $\pm$ 3    | 322 $\pm$ 5    | 89 $\pm$ 3     | 195 $\pm$ 4    | 20 $\pm$ 0    | 116 $\pm$ 2   | 46 $\pm$ 1    | 2595 $\pm$ 62  | 30 $\pm$ 1    | 82 $\pm$ 0    |
|       | 50 DAF | 72 $\pm$ 3                  | 21 $\pm$ 1    | 333 $\pm$ 16   | 88 $\pm$ 4     | 202 $\pm$ 9    | 21 $\pm$ 1    | 107 $\pm$ 5   | 84 $\pm$ 4    | 2755 $\pm$ 118 | 31 $\pm$ 4    | 84 $\pm$ 4    |

**Table S2** Fatty acid (FA) composition of diacylglycerols (DAG), triacylglycerols (TAG) and phosphatidylcholine (PC) in wildtype (Wt) and genetic modified (GM) Crambe seeds at different days after flowering (DAF). The results are from duplicate analyses  $\pm$  SD. (n.d, not detectable)

| Seeds |        | FA composition in DAG (Mol%) |               |                |                |                |                |               |               |                |               |               |
|-------|--------|------------------------------|---------------|----------------|----------------|----------------|----------------|---------------|---------------|----------------|---------------|---------------|
|       |        | 16:0                         | 18:0          | 18:1           | 18:2           | 18:3           | 20:0           | 20:1          | 22:0          | 22:1           | 24:0          | 24:1          |
| Wt    | 20 DAF | 4.6 $\pm$ 0.6                | 1.9 $\pm$ 0.2 | 38.5 $\pm$ 2.1 | 11.3 $\pm$ 0.6 | 3.6 $\pm$ 0.1  | 1.1 $\pm$ 0.1  | 5.9 $\pm$ 0.0 | 1.1 $\pm$ 0.3 | 25.7 $\pm$ 2.2 | 0.9 $\pm$ 0.2 | 0.7 $\pm$ 0.1 |
|       | 27 DAF | 3.5 $\pm$ 0.1                | 1.2 $\pm$ 0.0 | 37.9 $\pm$ 1.2 | 11.2 $\pm$ 0.8 | 4.0 $\pm$ 0.1  | 0.6 $\pm$ 0.3  | 4.8 $\pm$ 0.2 | 0.9 $\pm$ 0.1 | 30.2 $\pm$ 1.9 | 0.9 $\pm$ 0.1 | 0.8 $\pm$ 0.0 |
|       | 34 DAF | 3.2 $\pm$ 0.2                | 0.9 $\pm$ 0.0 | 23.9 $\pm$ 0.4 | 12.9 $\pm$ 0.4 | 3.8 $\pm$ 0.2  | 0.7 $\pm$ 0.1  | 2.8 $\pm$ 0.0 | 1.4 $\pm$ 0.0 | 43.9 $\pm$ 0.2 | 0.7 $\pm$ 0.1 | 1.3 $\pm$ 0.2 |
|       | 41 DAF | 2.5 $\pm$ 0.1                | 0.8 $\pm$ 0.0 | 27.3 $\pm$ 0.6 | 14.6 $\pm$ 0.2 | 5.3 $\pm$ 0.1  | 0.4 $\pm$ 0.1  | 2.2 $\pm$ 0.1 | 1.1 $\pm$ 0.0 | 40.3 $\pm$ 0.1 | 0.5 $\pm$ 0.1 | 1.3 $\pm$ 0.1 |
|       | 50 DAF | 2.6 $\pm$ 0.0                | 0.8 $\pm$ 0.0 | 28.2 $\pm$ 0.2 | 14.9 $\pm$ 0.5 | 5.4 $\pm$ 0.2  | 0.5 $\pm$ 0.0  | 2.3 $\pm$ 0.0 | 0.9 $\pm$ 0.0 | 39.3 $\pm$ 0.6 | 0.4 $\pm$ 0.0 | 1.1 $\pm$ 0.0 |
| GM    | 20 DAF | 6.4 $\pm$ 0.4                | 2.0 $\pm$ 0.1 | 26.6 $\pm$ 0.1 | 3.8 $\pm$ 0.0  | 2.6 $\pm$ 0.0  | 1.2 $\pm$ 0.0  | 8.6 $\pm$ 0.1 | 1.0 $\pm$ 0.2 | 42.0 $\pm$ 0.2 | 0.5 $\pm$ 0.4 | 0.5 $\pm$ 0.0 |
|       | 27 DAF | 3.9 $\pm$ 0.1                | 0.9 $\pm$ 0.2 | 17.1 $\pm$ 0.4 | 2.9 $\pm$ 0.4  | 2.1 $\pm$ 0.2  | 0.6 $\pm$ 0.0  | 7.6 $\pm$ 0.3 | 1.1 $\pm$ 0.1 | 58.1 $\pm$ 0.6 | 0.6 $\pm$ 0.0 | 0.8 $\pm$ 0.0 |
|       | 34 DAF | 3.7 $\pm$ 0.1                | 0.9 $\pm$ 0.1 | 8.5 $\pm$ 0.1  | 3.0 $\pm$ 0.1  | 2.5 $\pm$ 0.1  | 0.6 $\pm$ 0.0  | 5.8 $\pm$ 0.0 | 1.1 $\pm$ 0.0 | 67.2 $\pm$ 0.8 | 0.8 $\pm$ 0.2 | 1.4 $\pm$ 0.0 |
|       | 41 DAF | 2.3 $\pm$ 0.0                | 0.8 $\pm$ 0.1 | 10.2 $\pm$ 0.2 | 2.3 $\pm$ 0.3  | 3.2 $\pm$ 0.3  | 0.6 $\pm$ 0.0  | 5.8 $\pm$ 0.1 | 1.2 $\pm$ 0.0 | 66.8 $\pm$ 0.4 | 0.7 $\pm$ 0.1 | 2.0 $\pm$ 0.1 |
|       | 50 DAF | 2.0 $\pm$ 0.1                | 0.7 $\pm$ 0.1 | 10.0 $\pm$ 0.3 | 1.6 $\pm$ 0.3  | 2.6 $\pm$ 0.2  | 0.5 $\pm$ 0.1  | 5.6 $\pm$ 0.1 | 1.0 $\pm$ 0.0 | 69.8 $\pm$ 0.1 | 0.5 $\pm$ 0.1 | 1.8 $\pm$ 0.1 |
|       |        | FA composition in TAG (Mol%) |               |                |                |                |                |               |               |                |               |               |
|       |        | 16:0                         | 18:0          | 18:1           | 18:2           | 18:3           | 20:0           | 20:1          | 22:0          | 22:1           | 24:0          | 24:1          |
| Wt    | 20 DAF | 3.6 $\pm$ 0.1                | 1.2 $\pm$ 0.2 | 18.2 $\pm$ 0.0 | 12.2 $\pm$ 0.2 | 7.0 $\pm$ 0.2  | 1.1 $\pm$ 0.0  | 4.7 $\pm$ 0.0 | 1.7 $\pm$ 0.2 | 44.5 $\pm$ 0.7 | 0.5 $\pm$ 0.0 | 1.0 $\pm$ 0.0 |
|       | 27 DAF | 2.6 $\pm$ 0.0                | 0.8 $\pm$ 0.0 | 16.6 $\pm$ 0.4 | 10.0 $\pm$ 0.1 | 6.1 $\pm$ 0.0  | 0.7 $\pm$ 0.0  | 2.3 $\pm$ 0.1 | 1.6 $\pm$ 0.1 | 53.6 $\pm$ 0.3 | 0.5 $\pm$ 0.0 | 1.1 $\pm$ 0.0 |
|       | 34 DAF | 2.1 $\pm$ 0.0                | 0.6 $\pm$ 0.0 | 16.7 $\pm$ 0.3 | 10.7 $\pm$ 0.1 | 5.4 $\pm$ 0.0  | 0.7 $\pm$ 0.0  | 1.5 $\pm$ 0.1 | 2.4 $\pm$ 0.3 | 54.3 $\pm$ 0.7 | 0.6 $\pm$ 0.0 | 1.3 $\pm$ 0.0 |
|       | 41 DAF | 2.7 $\pm$ 0.4                | 0.6 $\pm$ 0.1 | 14.9 $\pm$ 0.7 | 10.2 $\pm$ 0.0 | 6.3 $\pm$ 0.1  | 0.7 $\pm$ 0.0  | 1.4 $\pm$ 0.0 | 2.0 $\pm$ 0.1 | 55.5 $\pm$ 0.2 | 0.5 $\pm$ 0.0 | 1.2 $\pm$ 0.0 |
|       | 50 DAF | 2.7 $\pm$ 0.1                | 0.7 $\pm$ 0.0 | 15.3 $\pm$ 0.1 | 10.1 $\pm$ 0.1 | 6.1 $\pm$ 0.1  | 0.7 $\pm$ 0.0  | 1.3 $\pm$ 0.0 | 1.9 $\pm$ 0.1 | 55.7 $\pm$ 0.2 | 0.5 $\pm$ 0.0 | 1.2 $\pm$ 0.0 |
| GM    | 20 DAF | 4.1 $\pm$ 0.4                | 1.1 $\pm$ 0.1 | 22.4 $\pm$ 0.9 | 5.8 $\pm$ 0.4  | 7.9 $\pm$ 0.9  | 1.0 $\pm$ 0.0  | 6.8 $\pm$ 0.2 | 1.5 $\pm$ 0.2 | 40.9 $\pm$ 2.8 | 0.5 $\pm$ 0.1 | 1.1 $\pm$ 0.2 |
|       | 27 DAF | 2.2 $\pm$ 0.3                | 0.6 $\pm$ 0.1 | 11.5 $\pm$ 0.1 | 3.5 $\pm$ 0.2  | 5.4 $\pm$ 0.1  | 0.6 $\pm$ 0.0  | 4.8 $\pm$ 0.0 | 1.8 $\pm$ 0.1 | 61.3 $\pm$ 0.4 | 0.8 $\pm$ 0.1 | 1.6 $\pm$ 0.1 |
|       | 34 DAF | 1.6 $\pm$ 0.1                | 0.5 $\pm$ 0.0 | 8.1 $\pm$ 0.4  | 2.5 $\pm$ 0.2  | 4.6 $\pm$ 0.1  | 0.6 $\pm$ 0.1  | 3.0 $\pm$ 0.1 | 2.0 $\pm$ 0.0 | 69.7 $\pm$ 0.8 | 0.7 $\pm$ 0.1 | 2.1 $\pm$ 0.1 |
|       | 41 DAF | 2.3 $\pm$ 0.2                | 0.5 $\pm$ 0.2 | 8.7 $\pm$ 0.2  | 2.4 $\pm$ 0.2  | 5.9 $\pm$ 0.4  | 0.6 $\pm$ 0.0  | 3.4 $\pm$ 0.2 | 1.9 $\pm$ 0.0 | 66.7 $\pm$ 1.5 | 0.5 $\pm$ 0.1 | 1.9 $\pm$ 0.1 |
|       | 50 DAF | 2.0 $\pm$ 0.1                | 0.6 $\pm$ 0.0 | 8.0 $\pm$ 0.0  | 2.3 $\pm$ 0.0  | 5.4 $\pm$ 0.1  | 0.6 $\pm$ 0.0  | 2.9 $\pm$ 0.0 | 1.9 $\pm$ 0.1 | 69.3 $\pm$ 0.5 | 0.7 $\pm$ 0.0 | 2.0 $\pm$ 0.0 |
|       |        | FA composition in PC (Mol%)  |               |                |                |                |                |               |               |                |               |               |
|       |        | 16:0                         | 18:0          | 18:1           | 18:2           | 18:3           | 20:0           | 20:1          | 22:0          | 22:1           | 24:0          | 24:1          |
| Wt    | 20 DAF | 13.9 $\pm$ 0.2               | 3.2 $\pm$ 0.2 | 21.8 $\pm$ 0.2 | 33.5 $\pm$ 0.0 | 17.7 $\pm$ 0.2 | 0.29 $\pm$ 0.0 | 3.0 $\pm$ 0.0 | 0.2 $\pm$ 0.0 | 2.5 $\pm$ 0.1  | n.d           | n.d           |
|       | 27 DAF | 12.9 $\pm$ 1.1               | 1.7 $\pm$ 0.2 | 26.2 $\pm$ 0.1 | 37.3 $\pm$ 0.0 | 13.4 $\pm$ 0.2 | 0.3 $\pm$ 0.0  | 2.2 $\pm$ 0.0 | 0.2 $\pm$ 0.0 | 2.5 $\pm$ 0.1  | n.d           | n.d           |
|       | 34 DAF | 9.8 $\pm$ 0.2                | 1.2 $\pm$ 0.1 | 42.6 $\pm$ 0.4 | 30.6 $\pm$ 0.1 | 8.0 $\pm$ 0.7  | 0.2 $\pm$ 0.0  | 1.9 $\pm$ 0.0 | 0.1 $\pm$ 0.0 | 1.8 $\pm$ 0.0  | n.d           | n.d           |
|       | 41 DAF | 8.3 $\pm$ 0.3                | 1.1 $\pm$ 0.1 | 42.0 $\pm$ 0.8 | 31.4 $\pm$ 0.9 | 6.8 $\pm$ 0.4  | 0.3 $\pm$ 0.0  | 2.2 $\pm$ 0.1 | 0.2 $\pm$ 0.1 | 3.4 $\pm$ 0.1  | n.d           | n.d           |
|       | 50 DAF | 8.4 $\pm$ 0.0                | 1.3 $\pm$ 0.0 | 41.6 $\pm$ 0.2 | 31.1 $\pm$ 0.3 | 6.7 $\pm$ 0.1  | 0.3 $\pm$ 0.0  | 2.3 $\pm$ 0.0 | 0.3 $\pm$ 0.0 | 3.8 $\pm$ 0.6  | n.d           | n.d           |
| GM    | 20 DAF | 13.9 $\pm$ 0.1               | 2.7 $\pm$ 0.1 | 40.1 $\pm$ 0.3 | 14.6 $\pm$ 0.2 | 19.2 $\pm$ 0.0 | 0.2 $\pm$ 0.0  | 2.5 $\pm$ 0.0 | 0.1 $\pm$ 0.0 | 2.5 $\pm$ 0.0  | n.d           | n.d           |
|       | 27 DAF | 10.9 $\pm$ 0.2               | 1.4 $\pm$ 0.1 | 51.1 $\pm$ 0.2 | 9.8 $\pm$ 0.3  | 16.1 $\pm$ 0.6 | 0.3 $\pm$ 0.0  | 2.5 $\pm$ 0.1 | 0.3 $\pm$ 0.0 | 3.6 $\pm$ 0.2  | n.d           | n.d           |
|       | 34 DAF | 8.7 $\pm$ 0.1                | 1.2 $\pm$ 0.0 | 49.4 $\pm$ 0.2 | 8.8 $\pm$ 0.1  | 20.0 $\pm$ 0.3 | 0.3 $\pm$ 0.0  | 3.3 $\pm$ 0.1 | 0.1 $\pm$ 0.0 | 1.8 $\pm$ 0.0  | n.d           | n.d           |
|       | 41 DAF | 7.6 $\pm$ 0.0                | 1.2 $\pm$ 0.1 | 47.4 $\pm$ 0.5 | 8.7 $\pm$ 0.1  | 21.7 $\pm$ 0.5 | 0.3 $\pm$ 0.0  | 3.8 $\pm$ 0.1 | 0.2 $\pm$ 0.1 | 2.4 $\pm$ 0.1  | n.d           | n.d           |
|       | 50 DAF | 7.6 $\pm$ 0.0                | 1.2 $\pm$ 0.0 | 50.1 $\pm$ 0.2 | 8.4 $\pm$ 0.0  | 19.9 $\pm$ 0.1 | 0.2 $\pm$ 0.0  | 4.0 $\pm$ 0.0 | 0.1 $\pm$ 0.0 | 1.9 $\pm$ 0.0  | n.d           | n.d           |

## Supplemental Data

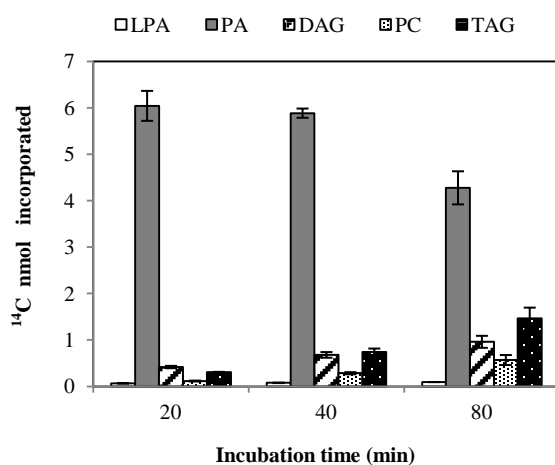

**Figure S1** Time course incorporation of radioactivity into various lipids in microsomal preparations from developing turnip incubated with [ $^{14}\text{C}$ ]glycerol 3-phosphate and 18:1-CoA. LPA, lysophosphatidic acid; PA, phosphatidic acid; DAG, diacylglycerol; PC, phosphatidylcholine; TAG, triacylglycerol. Results are shown from triplicates  $\pm$  SD.
